# Supplementary material for: Kirkendall void formation and selective directional growth of urchin-like ZnO/Zn microspheres through thermal oxidation in air
Source: Royal Society of Chemistry journal article supplement (doi:10.1039/c5ra19168h), 2015-01-01
Supplement: c5ra19168h1.pdf [file c5ra19168h1.pdf]

Fig. S1: SEM image of the urchin-like ZnO/Zn microspheres

Fig. S2: (a) TEM image of the outer shell of the microsphere, (b) SAED pattern of the shell and  
(c) HR-TEM image of the shell

Fig. S3: (a) UV-vis spectrum and (b) photoluminescence spectrum of the microspheres

Fig. S4: Temperature profile for the formation of the urchin-like microsphere

Fig. S5: SEM images correspond to oxidation of microspheres at various temperatures and dwell  
times

Fig. S6: (a) Weight gain of the urchin-like microspheres with various oxidation temperatures and  
dwell times, and (b) the thermogravimetric analysis (TGA) and differential thermal  
analysis (DTA) of the Zn microspheres with a ramping rate of 5 °C /minute in air

# Supplemental Information

## **Kirkendall void formation and selective directional growth of urchin-like ZnO/Zn microspheres through thermal oxidation in air**

**Chia-Yen Hsu<sup>1</sup>, Kai-Hsiang Chang<sup>1</sup>, Jyun-An Gong<sup>2</sup>, Jonas Tirén<sup>3</sup>, Yuan-Yao Li<sup>1,2,4,\*</sup> and  
Akiyoshi Sakoda<sup>5</sup>**

<sup>1</sup>Department of Chemical Engineering, National Chung Cheng University, Chia-Yi 62102, Taiwan, R.O.C.

<sup>2</sup>Graduate Institute of Opto-Mechatronics, National Chung Cheng University, Chia-Yi 62102, Taiwan, R.O.C.

<sup>3</sup>Lightlab Sweden AB, Uppsala Business Park, Uppsala, Sweden

<sup>4</sup>Advanced Institute of Manufacturing with High-Tech Innovations, National Chung Cheng University, Chia-Yi 62102, Taiwan R.O.C.

<sup>5</sup>Institute of Industrial Science, University of Tokyo, 4-6-1 Komaba, Meguro-ku, Tokyo 153-8505, Japan

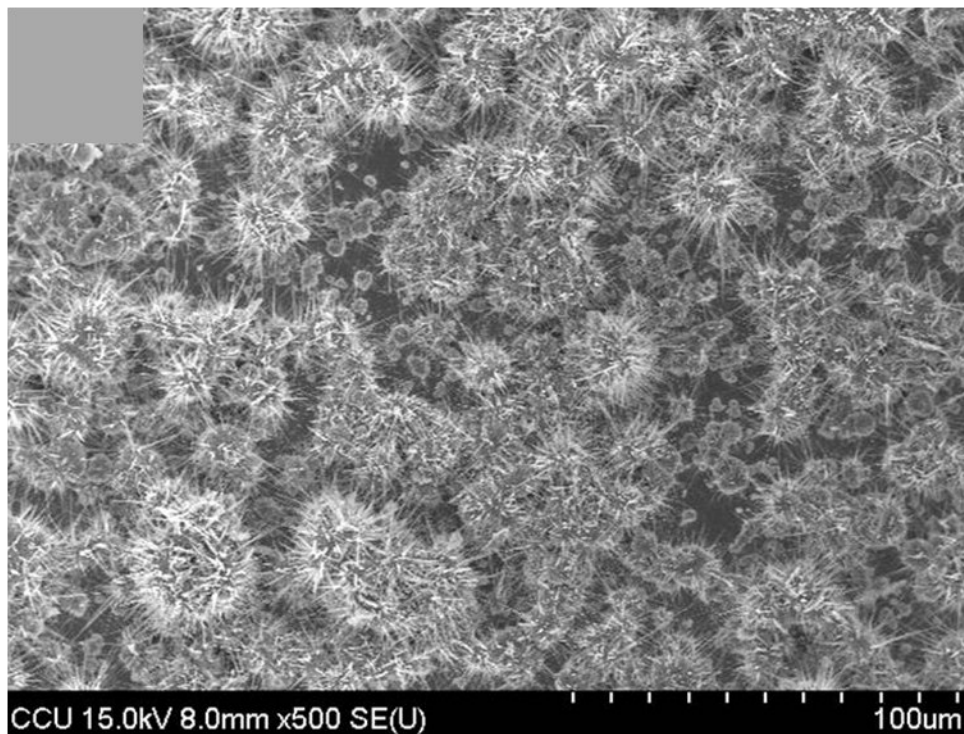

Figure S1: SEM image of the urchin-like ZnO/Zn microspheres

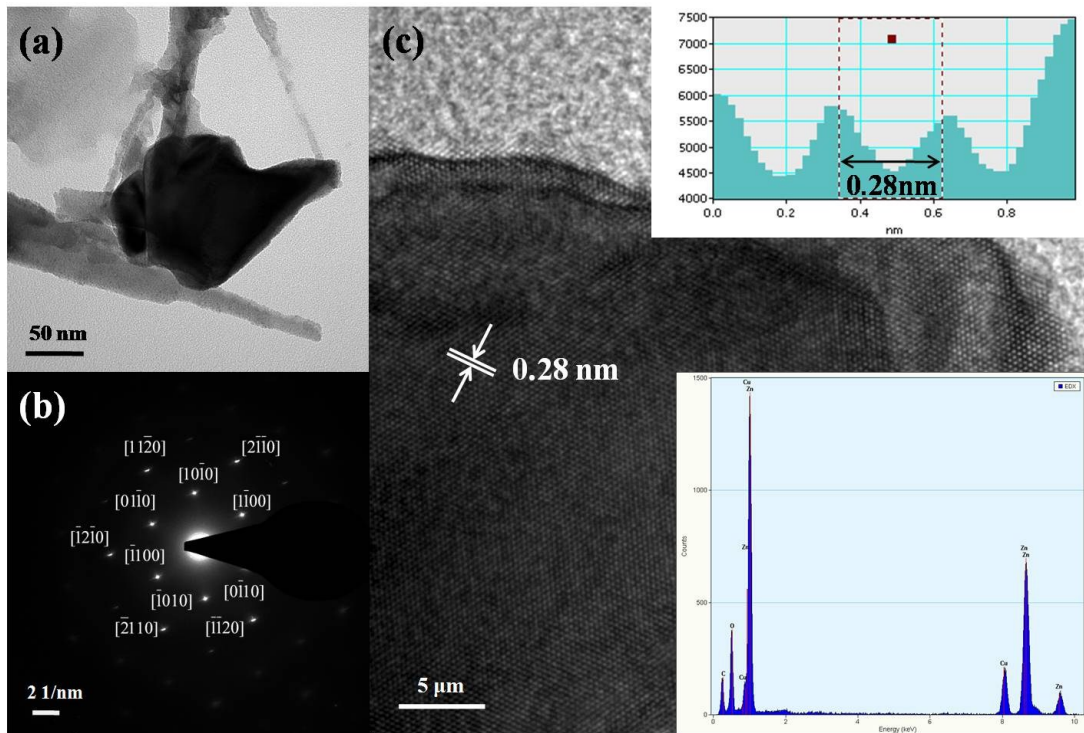

Figure S2: (a) TEM image of the outer shell of the microsphere, (b) SAED pattern of the shell, and (c) HR-TEM image of the shell

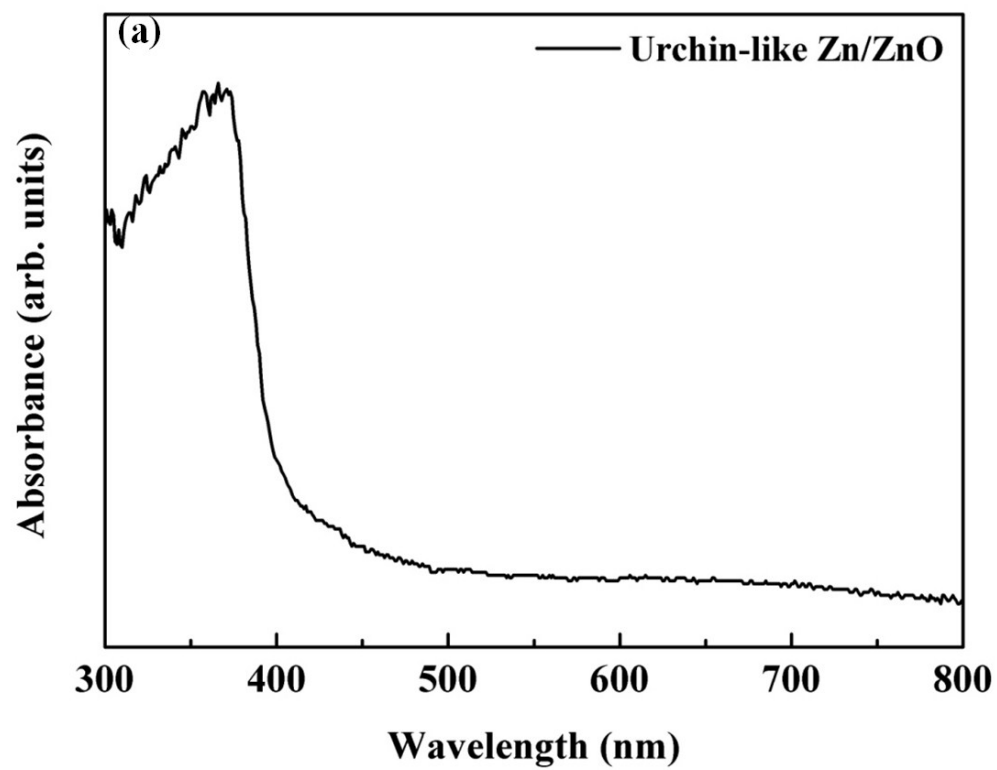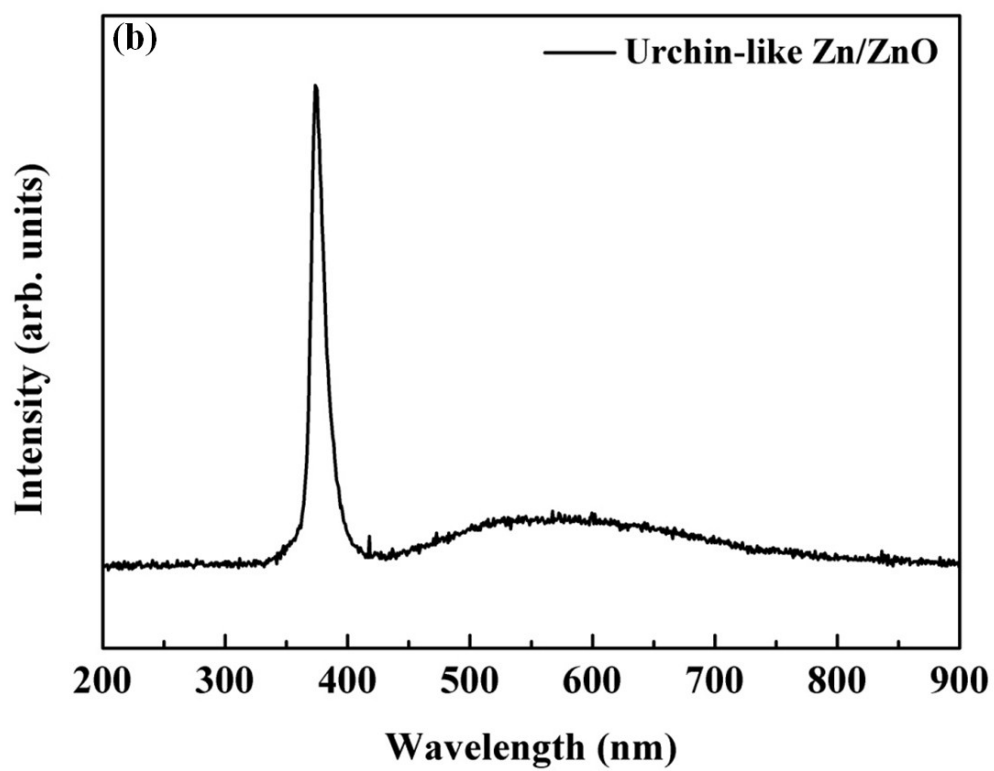

Figure S3: (a) UV-vis spectrum and (b) photoluminescence spectrum of the microspheres

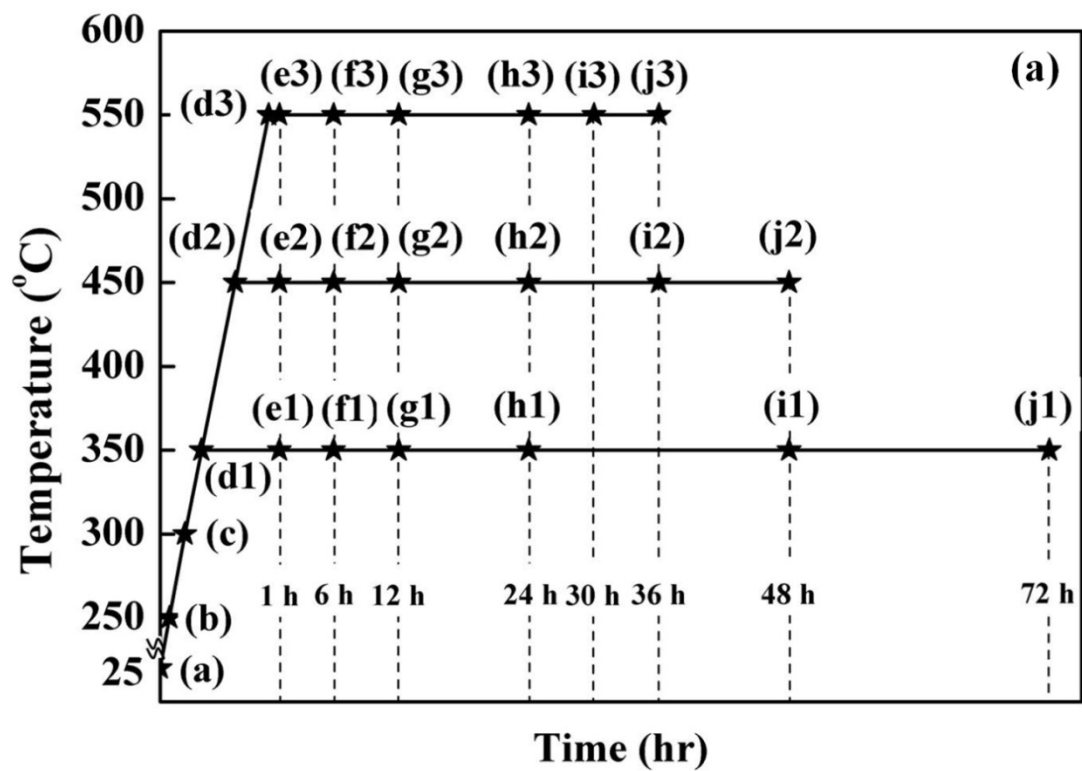

Figure S4: Temperature profile for the formation of the urchin-like microsphere

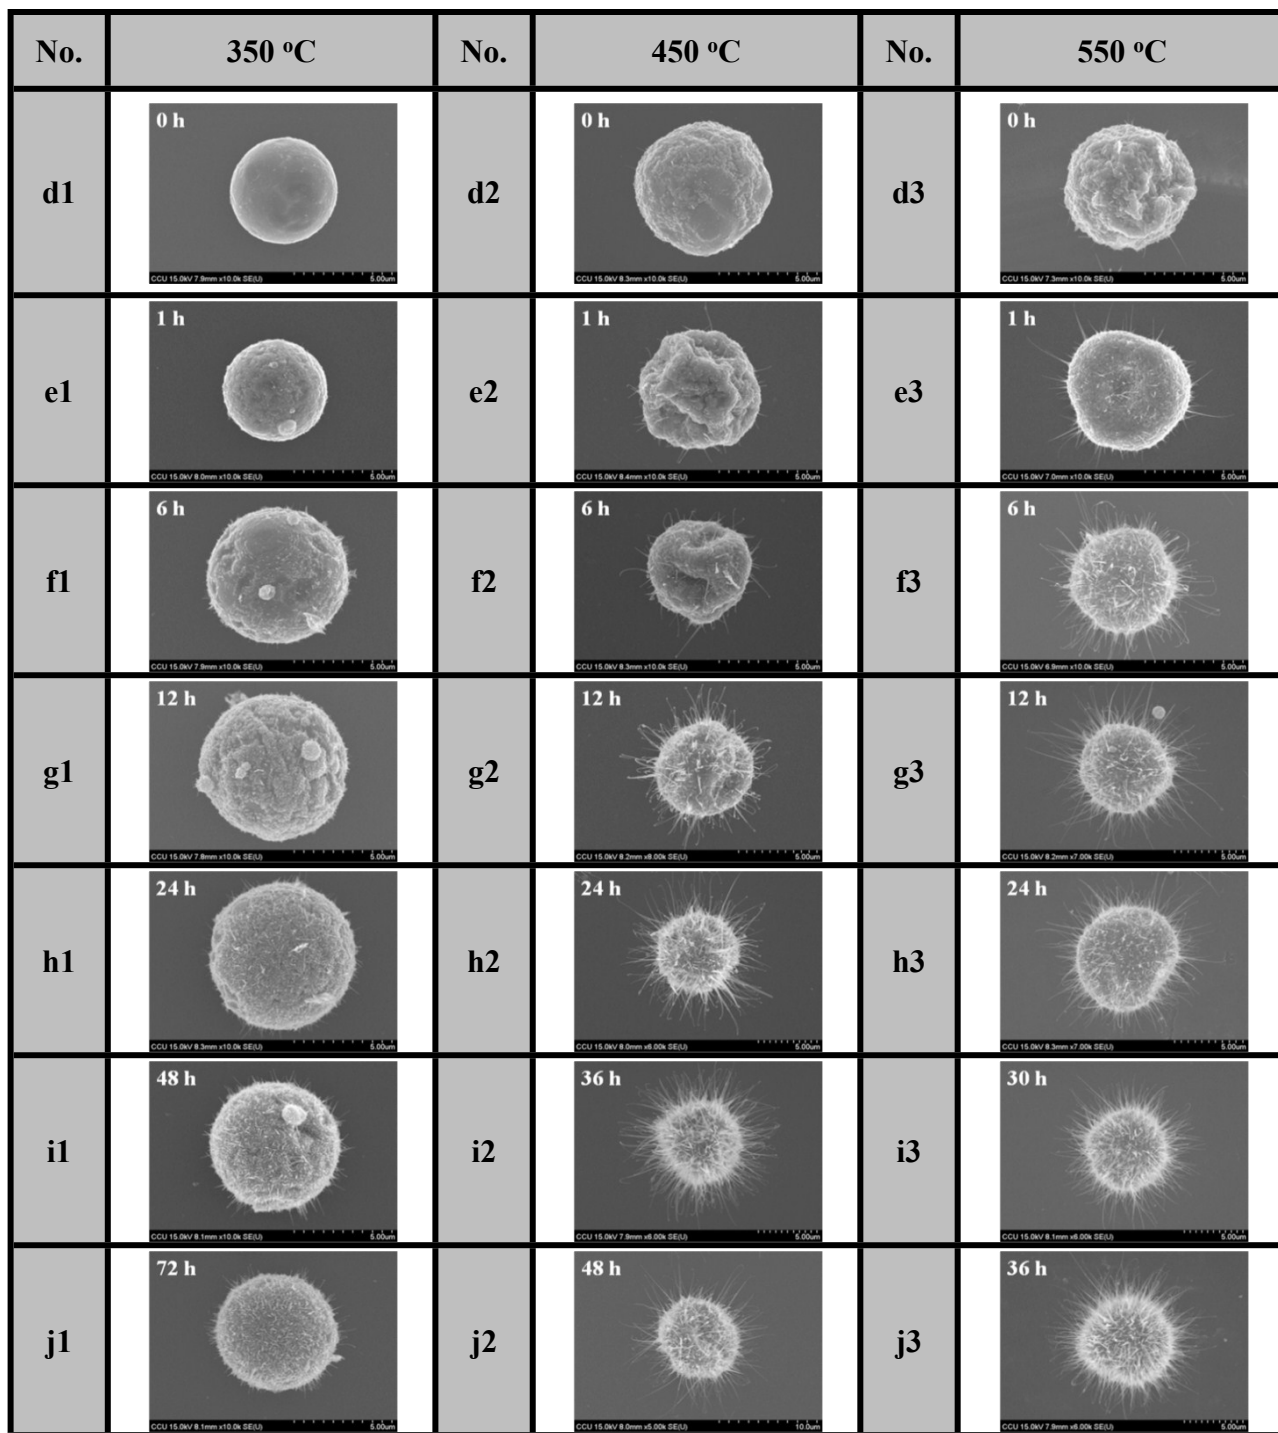

Figure S5: SEM images correspond to oxidation of microspheres at various temperatures and dwell times

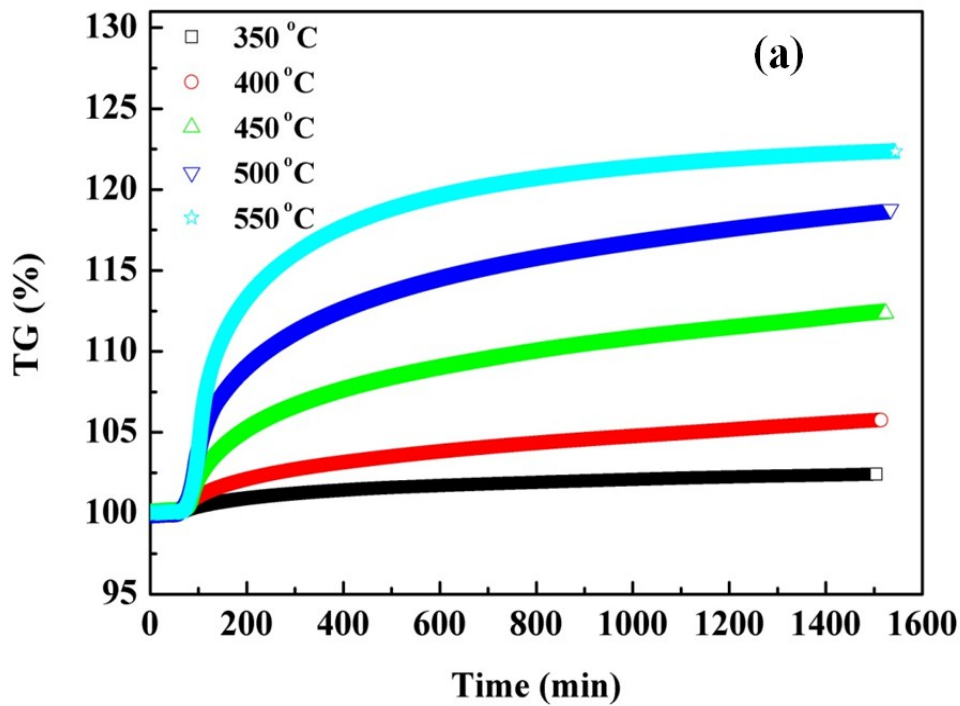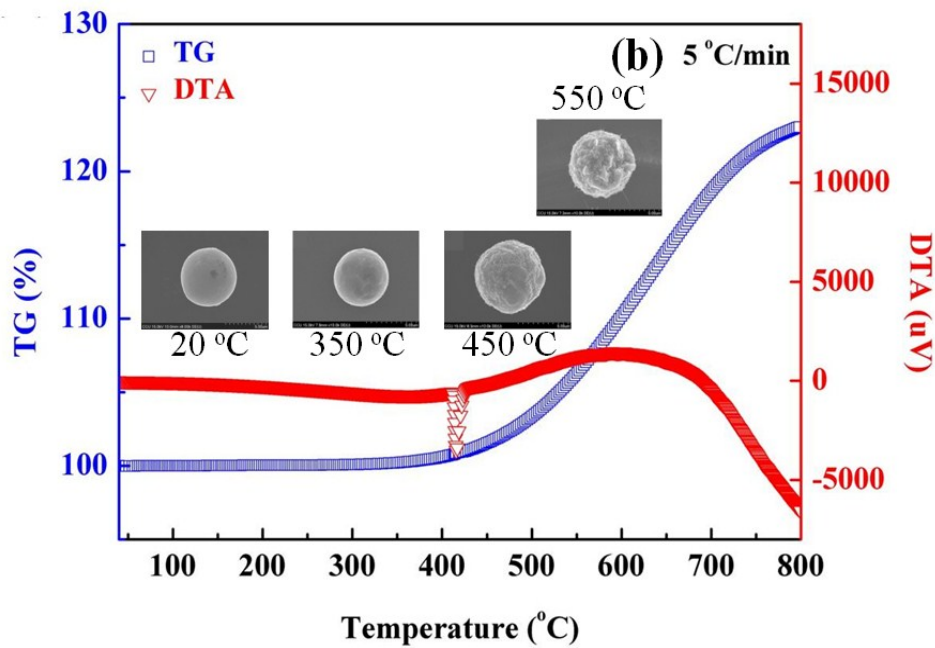

Figure S6: (a) Weight gain by the urchin-like microspheres with various oxidation temperatures and dwell times, and (b) the thermogravimetric analysis (TGA) and differential thermal analysis (DTA) of the Zn microspheres with a ramping rate of 5 °C/minute in air
